# Supplementary material
Source: PubMed Central journal article supplement (PMC3632359)
Supplement: NIHMS447274-supplement-supplement_1.pdf [file NIHMS447274-supplement-supplement_1.pdf]

## ONLINE SUPPLEMENT

Atrial fibrillation is associated with reduced brain volume and cognitive function independent of cerebral infarcts

Hrafnhildur Stefansdottir M.D.<sup>1</sup>, David O. Arnar M.D.,Ph.D<sup>1,2</sup>, Thor Aspelund Ph.D<sup>1,3</sup>, Sigurdur Sigurdsson M.Sc<sup>3</sup>, Maria K. Jonsdottir Ph.D<sup>3,4</sup>, Haukur Hjaltason M.D.,Ph.D<sup>5</sup>, Lenore J. Launer Ph.D<sup>6</sup>, Vilmundur Gudnason M.D.,Ph.D<sup>1,3</sup>

<sup>1</sup> Faculty of Medicine, University of Iceland, Reykjavik, Iceland

<sup>2</sup> Cardiovascular Research Center, Department of Medicine, Landspítali - The National University Hospital of Iceland, Reykjavik, Iceland

<sup>3</sup> The Icelandic Heart Association, Kopavogur, Iceland

<sup>4</sup> Faculty of Psychology, University of Iceland, Reykjavik, Iceland

<sup>5</sup> Department of Neurology, Landspítali - The National University Hospital of Iceland, Reykjavik, Iceland

<sup>6</sup> Laboratory of Epidemiology, Demography, and Biometry, National Institute of Aging, The National Institutes of Health, Bethesda, Maryland, United States.

Supplemental table 1 (S1): Association between atrial fibrillation (AF) and MRI measured brain volumes: the AGES-Reykjavik Study

|                      | No AF                  | AF                       |
|----------------------|------------------------|--------------------------|
| Total brain volume   |                        |                          |
| Unadjusted           | 1082.8 (1079.6-1086.0) | 1080.5 (1069.5-1091.5)   |
| Model 1 <sup>a</sup> | 1092.4 (1089.6-1095.2) | 1076.0 (1066.9-1085.2) ‡ |
| Model 2 <sup>b</sup> | 1059.0 (1045.8-1072.3) | 1043.7 (1029.1-1058.3) † |
| Gray matter volume   |                        |                          |
| Unadjusted           | 677.3 (675.3-679.3)    | 669.3 (662.5-676.0) *    |
| Model 1 <sup>a</sup> | 682.2 (680.5-684.0)    | 669.0 (663.2-674.7) ‡    |
| Model 2 <sup>b</sup> | 657.6 (649.3-665.8)    | 645.2 (636.1-654.4) ‡    |
| White matter volume  |                        |                          |
| Unadjusted           | 386.0 (384.5-387.5)    | 386.2 (381.0-391.3)      |
| Model 1 <sup>a</sup> | 390.3 (388.9-391.6)    | 383.9 (379.6-388.3) †    |
| Model 2 <sup>b</sup> | 381.4 (375.0-387.7)    | 376.5 (369.5-383.5) *    |
| WMH volume           |                        |                          |
| Unadjusted           | 19.5 (18.8-20.1)       | 25.1 (22.9-27.3) ‡       |
| Model 1 <sup>a</sup> | 19.9 (19.2-20.5)       | 23.2 (21.0-25.3) †       |
| Model 2 <sup>b</sup> | 20.1 (17.0-23.2)       | 22.0 (18.6-25.4)         |

Data are mean volume in ml (95% confidence interval). Comparison to no AF: \*  $P < 0.05$ , †  $P < 0.01$ , ‡  $P < 0.001$

<sup>a</sup> Model 1: adjusted for age, sex and education level

<sup>b</sup> Model 2: adjusted for age, sex, education level, body mass index, height, smoking, alcohol consumption, hypercholesterolemia, hypertension, diabetes, myocardial infarction and heart failure and cerebral infarcts on MRI

WMH = white matter hyperintensities
